# Supplementary material for: Periodic arrays of liquid crystalline torons in microchannels
Source: Royal Society of Chemistry journal article supplement (doi:10.1039/c4ra16883f), 2015-01-01
Supplement: c4ra16883f1.pdf [file c4ra16883f1.pdf]

## **Supporting Information for:**

# **Periodic arrays of liquid crystalline torons in micro-channels**

Yun Ho Kim,<sup>a</sup> Min-Jun Gim,<sup>b</sup> Hee-Tae Jung,<sup>c</sup> and Dong Ki Yoon<sup>\*b</sup>

<sup>a</sup> Advanced Functional Materials Research Group, KRICT, Daejeon, 305-701, Republic of Korea.

<sup>b</sup> Graduate School of Nanoscience and Technology and KINC, KAIST, Daejeon, 305-701, Republic of Korea. Fax: +82 42 350 1110; Tel: +8242 350 1156; E-mail: [nandk@kaist.ac.kr](mailto:nandk@kaist.ac.kr).

<sup>c</sup> Department of Chemical and Biomolecular Engineering, KAIST, Daejeon, 305-701, Republic of Korea.

***Figure S1.***

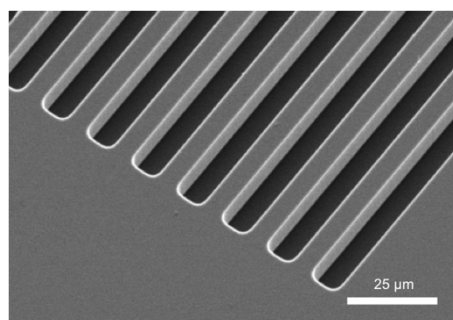

**Fig S1.** The SEM image of a bare microchannel width 5 μm and 5 μm depth.

***Figure S2.***

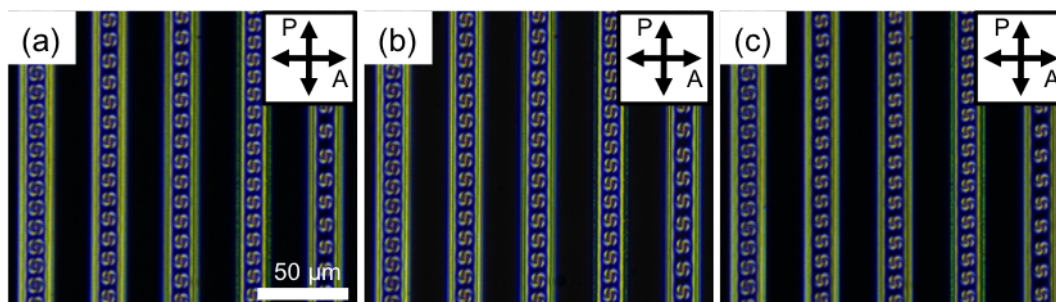

**Fig S2.** The DRLM images of CLC mixture in a 20  $\mu\text{m}$ -wide and 5  $\mu\text{m}$  deep microchannel as a function of time. The torons are generated by quenching from 50  $^{\circ}\text{C}$  to room temperature. Observation was made at (a) 1, (b) 2 and (c) 3 weeks after generating the structures.
